# Supplementary material for: Distribution and diversity of dimetal-carboxylate halogenases in cyanobacteria
Source: PubMed Central journal article supplement (PMC8406957; doi:10.1186/s12864-021-07939-x), 2021-08-31
Supplement: 12864_2021_7939_MOESM1_ESM.pdf [file 12864_2021_7939_MOESM1_ESM.pdf]

## Supplementary Material

### Distribution and diversity of dimetal-carboxylate halogenases in cyanobacteria

Nadia Eusebio<sup>1</sup>, Adriana Rego<sup>1</sup>, Nathaniel R. Glasser<sup>2</sup>, Raquel Castelo-Branco<sup>1</sup>, Emily P. Balskus<sup>2\*</sup> and Pedro N. Leão<sup>1\*</sup>

<sup>1</sup>Interdisciplinary Centre of Marine and Environmental Research (CIIMAR/CIMAR), University of Porto, Matosinhos, Portugal

<sup>2</sup>Department of Chemistry and Chemical Biology, Harvard University, Cambridge, MA, USA

\*Corresponding authors, E-mail: pleao@ciimar.up.pt, balskus@chemistry.harvard.edu

**Table S1.** Accession number of *cylC* homologs and *aurF* genes used for primer design.

| <b>Name</b>                                                | <b>Accession number</b>     |
|------------------------------------------------------------|-----------------------------|
| <i>Anabaena cylindrica</i> PCC 7122                        | AP018166.1:4354075-4355373  |
| <i>Anabaena cylindrica</i> PCC 7122                        | CP003659.1:3493241-3494452  |
| <i>Anabaena minutissima</i> UTEX B 1613                    | MH325199.1:28248-29645      |
| <i>Aulosira laxa</i> NIES-50                               | AP018307.1:7246161-7247336  |
| <i>Calothrix brevissima</i> NIES-22                        | AP018207.1:8432194-8433369  |
| <i>Calothrix parasitica</i> NIES-267                       | AP018227.1:c657283-656117   |
| <i>Calothrix</i> sp. 336/3                                 | CP011382.1:4155917-4157092  |
| <i>Calothrix</i> sp. NIES-2098                             | AP018172.1:4832715-4833896  |
| <i>Calothrix</i> sp. NIES-2100                             | AP018178.1:1190855-1192015  |
| <i>Calothrix</i> sp. NIES-4071                             | AP018255.1:772595-773998    |
| <i>Calothrix</i> sp. NIES-4071                             | AP018255.1:7573114-7574265  |
| <i>Calothrix</i> sp. NIES-4105                             | AP018290.1:7570946-7572097  |
| <i>Calothrix</i> sp. NIES-4105                             | AP018290.1:c773967-772564   |
| <i>Crinalium epipsammum</i> PCC 9333                       | CP003620.1:c2520624-2519380 |
| <i>Cyanobacterium aponinum</i> PCC 10605                   | CP003947.1:1114945-1116162  |
| <i>Cyanothece</i> sp. PCC 7822 plasmid Cy782201            | CP002199.1:360048-361412    |
| <i>Cylindrospermum licheniforme</i> UTEX B 2014            | KX682397.1:2961-4376        |
| <i>Cylindrospermum</i> sp. NIES-4074                       | AP018269.1:2484675-2486075  |
| <i>Cylindrospermum stagnale</i> PCC 7417                   | CP003642.1:c2217555-2216140 |
| <i>Cylindrospermum stagnale</i> PCC 7417                   | CP003642.1:c2308133-2306952 |
| <i>Cylindrospermum stagnale</i> PCC 7417 plasmid pCYLST.01 | CP003643.1:56891-58261      |
| <i>Fischerella</i> sp. NIES-4106                           | AP018298.1:1441529-1442746  |
| <i>Fremyella diplosiphon</i> NIES-3275                     | AP018233.1:1201630-1202805  |
| <i>Geitlerinema</i> sp. PCC 7407                           | CP003591.1:c2644190-2642961 |
| <i>Microcoleus</i> sp. PCC 7113                            | CP003630.1:c2944932-2943757 |
| <i>Moorea bouillonii</i> PNG5-198                          | KP715425.1:20564-21952      |
| <i>Moorea bouillonii</i> PNG5-198                          | KP715425.1:22089-23501      |
| <i>Moorea producens</i> JHB                                | CP017708.1:c2514441-2513215 |
| <i>Moorea producens</i> PAL-8-15-08-1                      | CP017599.1:c2474933-2473707 |
| <i>Nodularia</i> sp. HBU26                                 | KY594676.1:18618-19922      |
| <i>Nostoc carneum</i> NIES-2107                            | AP018180.1:4766806-4767993  |
| <i>Nostoc commune</i> HK-02                                | AP018326.1:6163477-6164874  |
| <i>Nostoc flagelliforme</i> CCNUN1                         | CP024785.1:1135915-1137312  |
| <i>Nostoc punctiforme</i> PCC 73102                        | CP001037.1:4184899-4186269  |
| <i>Nostoc punctiforme</i> PCC 73102,                       | CP001037.1:c5828161-5826956 |
| <i>Nostoc</i> sp. CAVN2                                    | KT826756.1:3912-5327        |
| <i>Nostoc</i> sp. CCAP 1453/38                             | KP143720.1:21035-22441      |
| <i>Nostoc</i> sp. CCAP 1453/38                             | KP143720.1:22490-23818      |
| <i>Nostoc</i> sp. CENA543                                  | CP023278.1:c1270872-1269652 |
| <i>Nostoc</i> sp. 'Lobaria pulmonaria' (5183)              | CP026692.1:3554655-3555860  |
| <i>Nostoc</i> sp. NIES-4103                                | AP018288.1:c2213285-2211918 |
| <i>Nostoc</i> sp. NIES-4103                                | AP018288.1:c3294496-3293132 |
| <i>Nostoc</i> sp. PCC 7524                                 | CP003552.1:c5619284-5618085 |
| <i>Nostoc</i> sp. 'Peltigera membranacea cyanobiont' N6    | CP026681.1:c3280480-3279275 |

Supplementary Material – Eusebio et al. 2021

|                                          |                             |
|------------------------------------------|-----------------------------|
| <i>Nostoc</i> sp. UIC 10110              | KY379971.1:817-2223         |
| <b>Table S1.</b> (continued)             |                             |
| <i>Nostocales</i> cyanobacterium HT-58-2 | CP019636.1:1098629-1099993  |
| <i>Oscillatoria acuminata</i> PCC 6304   | CP003607.1:c70363-69134     |
| <i>Pleurocapsa</i> sp. PCC 7327          | CP003590.1:298214-299635    |
| <i>Rivularia</i> sp. PCC 7116            | CP003549.1:c7519531-7518356 |
| <i>Stanieria</i> sp. NIES-3757           | AP017376.1:c59518-58163     |
| <i>Streptomyces thioluteus</i> HKI-22    | AJ575648.1:4858-5868        |
| <i>Synechocystis salina</i> LEGE 06099   | KX083339.1:12314-13522      |
| <i>Synechocystis salina</i> LEGE 06155   | KR059027.1:13578-14783      |
| <i>Synechocystis</i> sp. IPPAS B-1465    | CP028094.1:c2118162-2116924 |
| <i>Synechocystis</i> sp. PCC 6714        | CP007542.1:c2270478-2269219 |
| <i>Synechocystis</i> sp. PCC 6803        | CP003265.1:c2114589-2113351 |
| <i>Tolypothrix tenuis</i> PCC 7101       | AP018248.1:c3613364-3612189 |

---

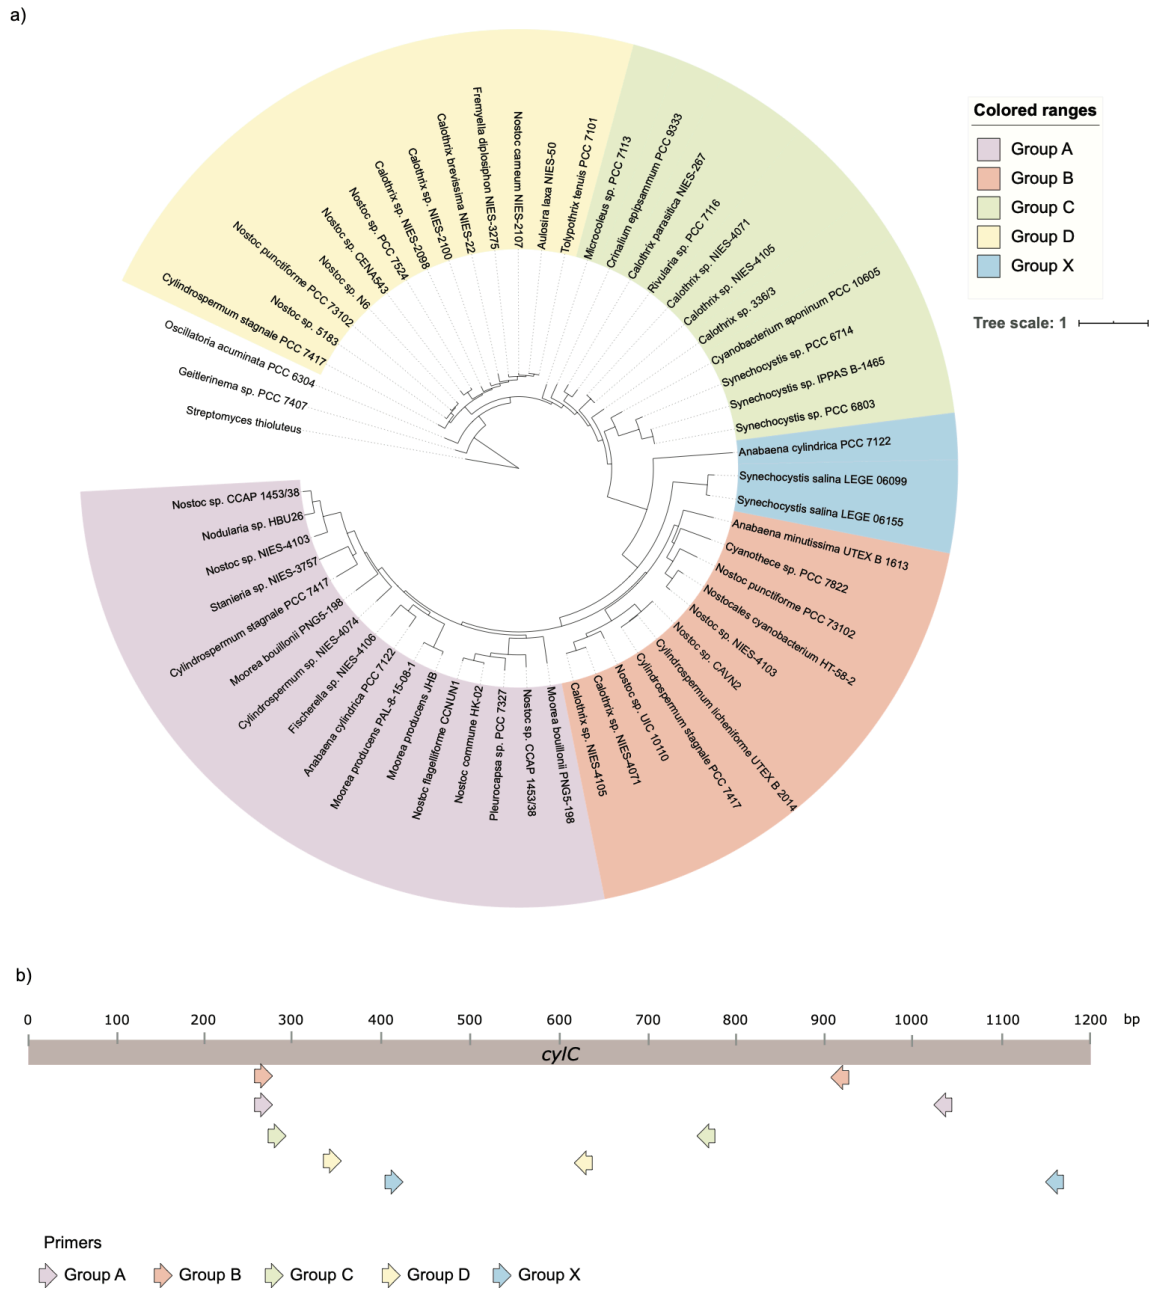

**Figure S1.** (a) Phylogenetic tree (FastTree GTR with a rate of 100) of *cyIC* homologs highlighted according to the groups selected for degenerate primer design. (b) Schematic representation of the different pairs of degenerate primers

Group of primers A

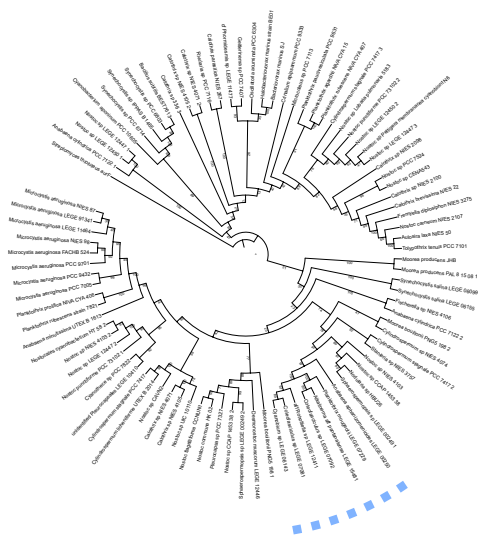

Group of primers B

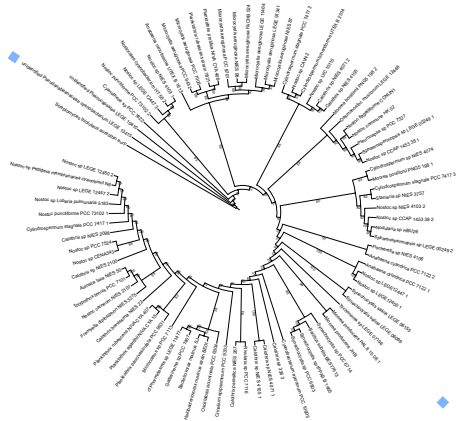

Group of primers C

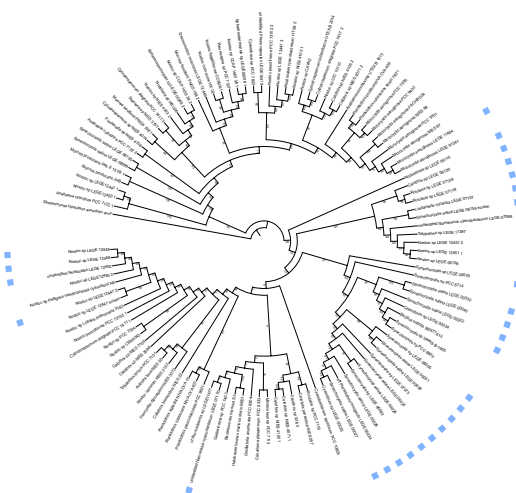

Group of primers D

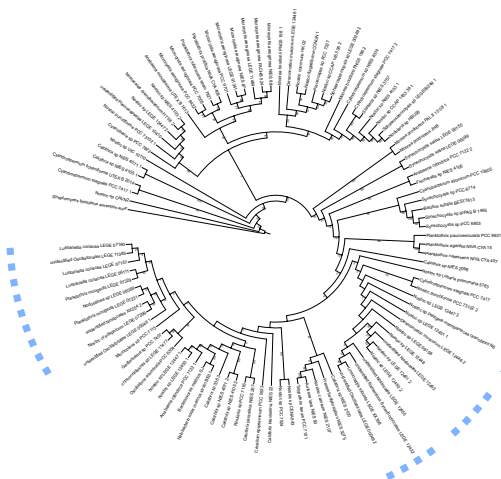

Group of primers X

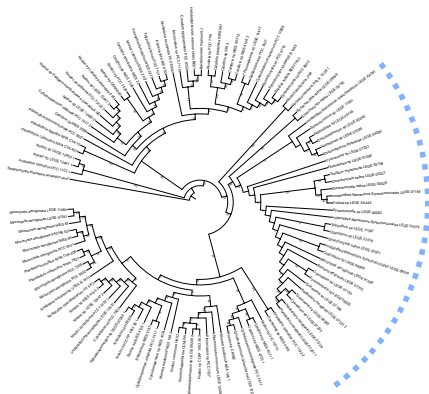

**Figure S2.** PCR-based detection of *cyfC* homologs in the LEGEcc culture collection. Five pairs of primers were designed based on conserved regions identified in the *cyfC* gene. Each primer pair was used in a PCR screen of the gDNA obtained from diverse strains (n = 326) of the LEGEcc culture collection. The resulting amplicons were cloned and sequenced. Sequences for each primer pair were aligned with the corresponding regions of *cyfC* genes found in the NCBI reference genomes (cyanobacteria only) and those from LEGEcc strains' genomes. Shown are the resulting cladograms (RaxML, 1000 replicates) for each primer pair used in the screening. Blue squares indicate sequences obtained from the PCR screen.

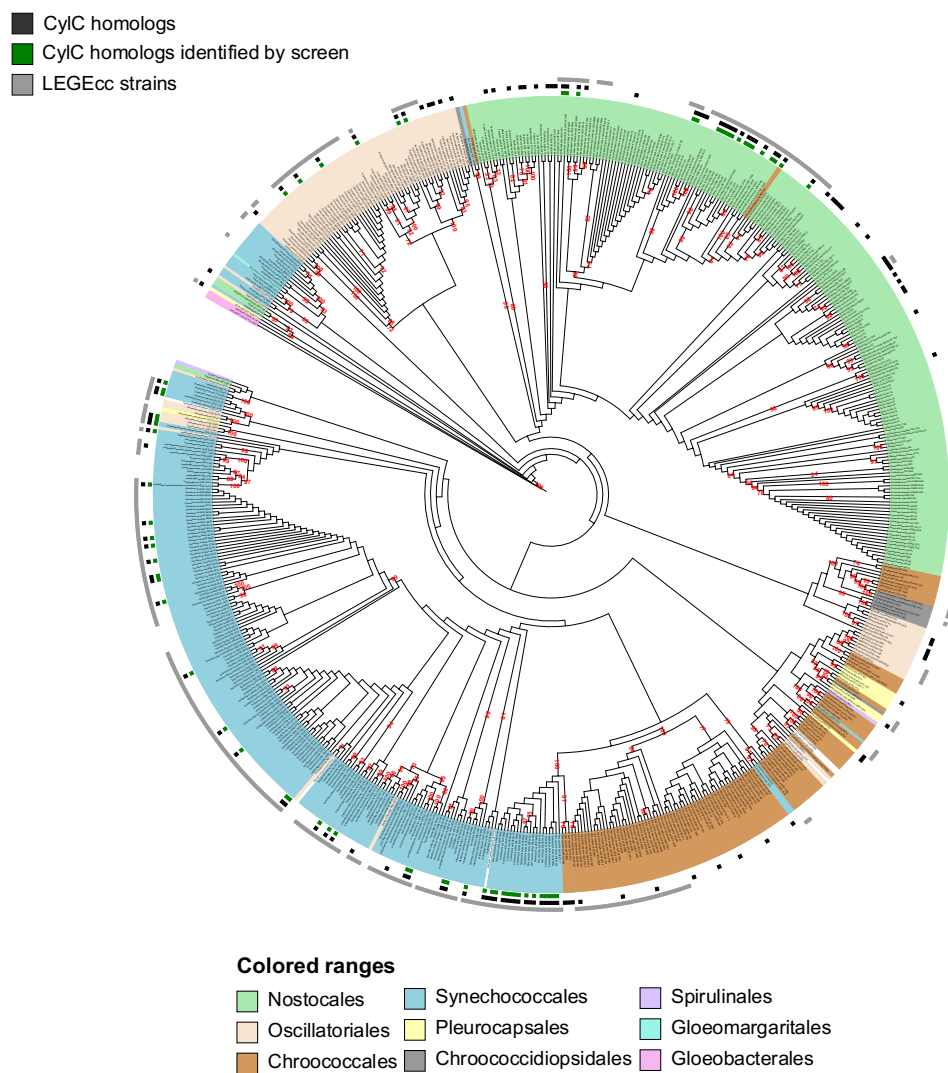

**Figure S3.** RaxML cladogram (1000 replicates) of the 16S rRNA gene of LEGEcc strains (grey squares) and from cyanobacterial strains with NCBI-deposited reference genomes, screened in this study. Taxonomy is presented at the order level (colored ranges). Strains whose genomes encode CylC homologs are denoted by black squares. Green squares indicate that at least one CylC homolog was detected by PCR-screening and verified by retrieving the sequence of the

*Supplementary Material – Eusebio et al. 2021*

corresponding amplicon through cloning followed by Sanger sequencing. The cladogram topology is the same as shown in Figure 3 of the main manuscript, but here bootstrap values (equal or above 0.7) are shown.



**Table S2.** GenBank or RefSeq assembly accession number and LEGEcc genome used for CORASON analysis.

| Enzyme  | Reference genome | Number of genomes/Clusters tested in CORASON | Removed from the alignment                                                                                    | Included manually extracted BGCs from genomes                                                                                                                                                                                                                                                                                                                                                                                                                                                                                                                                                                                                                                                                                                          |
|---------|------------------|----------------------------------------------|---------------------------------------------------------------------------------------------------------------|--------------------------------------------------------------------------------------------------------------------------------------------------------------------------------------------------------------------------------------------------------------------------------------------------------------------------------------------------------------------------------------------------------------------------------------------------------------------------------------------------------------------------------------------------------------------------------------------------------------------------------------------------------------------------------------------------------------------------------------------------------|
| CylC    | GCA_000317535.1  | 2170                                         | GCA_003504865.1,<br>LEGE00239,<br>GCA_000332035.1,<br>GCA_004305995.1,<br>GCA_003206555.1,<br>GCA_000312205.1 | CP011382.1, CP026692.1, NZ_LN887838.1, NZ_LN887838.1, KT826756.1, KP143720.1, NZ_CP023280.1, KY594676.1, NZ_CP028099.1, LEGE00239, LEGE_00249, LEGE06071, LEGE06083, LEGE06083, LEGE_06099, LEGE_06155, LEGE07170, LEGE11397, LEGE_11477, LEGE11479, LEGE11480, LEGE12450, LEGE12450, , NZ_CP026681.1, AP018172.1, AP018178.1, AP018180.1, AP018207.1, AP018227.1, AP018233.1, AP017375.1, AP018307.1, NZ_AVFS00000000.1, NZ_AVFV00000000.1, NZ_AVFV00000000.1, NZ_KE734719.1, NC_019776.1", NC_019693.1, CP007542.1, CP003265.1, NZ_AQPY00000000.1, NZ_AP018248.1, CP003630.1, CP003549.1, CP003591.1, CP003642.1, CP003552.1, CP003620.1, NZ_ALVX00000000.1, NZ_ALVX00000000.1, NZ_HE972553.1, NZ_CZCS00000000.2, KY379971.1, MH325199.1, KX682397.1 |
| PrnA    | GCA_005518235.1  | 2114                                         | GCA_002025445.1,<br>GCA_002025445.1                                                                           | -                                                                                                                                                                                                                                                                                                                                                                                                                                                                                                                                                                                                                                                                                                                                                      |
| CurA    | GCA_001942475.1  | 2116                                         | -                                                                                                             | -                                                                                                                                                                                                                                                                                                                                                                                                                                                                                                                                                                                                                                                                                                                                                      |
| mcnD    | GCA_000312245.1  | 2114                                         | LEGE 17501, LEGE 91341                                                                                        | -                                                                                                                                                                                                                                                                                                                                                                                                                                                                                                                                                                                                                                                                                                                                                      |
| hs_bmp5 | GCA_001942475.1  | 2114                                         | GCA_005518205.1,<br>GCA_005518235.1                                                                           | -                                                                                                                                                                                                                                                                                                                                                                                                                                                                                                                                                                                                                                                                                                                                                      |
| WelO5   | GCA_000447295.1  | 2116                                         | -                                                                                                             | -                                                                                                                                                                                                                                                                                                                                                                                                                                                                                                                                                                                                                                                                                                                                                      |

**Table S3.** BLASTp search of CylC homologs against *Aliterella sp.*, *Chroococcidiopsis sp.* and *Gloeobacter sp.*

| <b>Input</b>                    | <b>CylC</b>                                               | <b>BrtJ</b> | <b>ColE</b> | <b>ColD</b> | <b>NocO</b> | <b>NocN</b> | <b>Mic</b> |
|---------------------------------|-----------------------------------------------------------|-------------|-------------|-------------|-------------|-------------|------------|
| <b>Strain/ Accession Number</b> | <b><i>Aliterella atlantica</i>/ WP_045054787.1</b>        |             |             |             |             |             |            |
| <b>Coverage</b>                 | 94%                                                       | 95%         | 93%         | 96%         | 95%         | 97%         | 98%        |
| <b>E-value</b>                  | 3,00E-147                                                 | 4,00E-67    | 2,00E-153   | 7,00E-176   | 8,00E-124   | 0.0         | 7,00E-148  |
| <b>Percent identity</b>         | 47.33%                                                    | 41.70%      | 49.32%      | 51.72%      | 43.57%      | 69.52%      | 46.96%     |
| <b>Strain/ Accession Number</b> | <b><i>Chroococcidiopsis sp. TS-821</i>/WP_104546385.1</b> |             |             |             |             |             |            |
| <b>Coverage</b>                 | 98%                                                       | 99%         | 93%         | 99%         | 95%         | 99%         | 94%        |
| <b>E-value</b>                  | 4,00E-155                                                 | 9,00E-68    | 8,00E-159   | 7,00E-175   | 1,00E-121   | 0.0         | 6,00E-150  |
| <b>Percent identity</b>         | 48.65%                                                    | 42.98%      | 51.93%      | 50.85%      | 43.15%      | 68.66%      | 49.22%     |
| <b>Strain/ Accession Number</b> | <b><i>Gloeobacter violaceus SpSt-379</i>/HGZ84776.1</b>   |             |             |             |             |             |            |
| <b>Coverage</b>                 | 94%                                                       | 94%         | 95%         | 95%         | 100%        | 94%         | 95%        |
| <b>E-value</b>                  | 1,00E-57                                                  | 1E-109      | 5,00E-92    | 1,00E-98    | 3,00E-87    | 3,00E-100   | 5,00E-62   |
| <b>Percent identity</b>         | 42.79%                                                    | 43.98%      | 36.00%      | 37.64%      | 34.39%      | 37.16%      | 46.73%     |

Supplementary Material – Eusebio et al. 2021

*Calothrix brevissima* NIES-22 DNA

AP018207.1  
17.5 kb

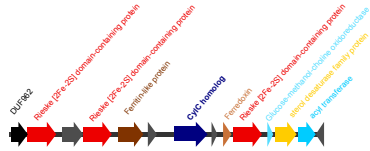

*Tolypothrix tenuis* PCC 7101

AP018248.1  
26.2 kb

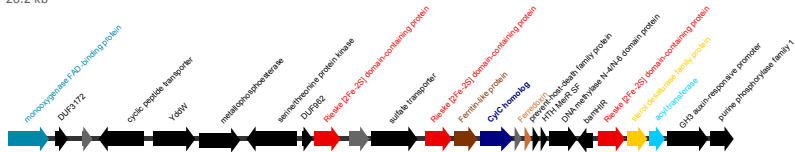

*Nostoc punctiforme* PCC 73102

CP001037.1  
Cluster 2  
20.6 kb

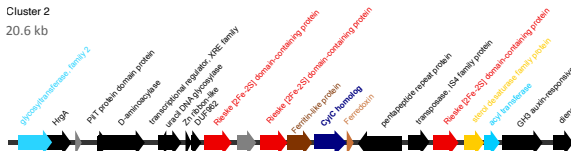

*Aulosira laxa* NIES-50

AP018307.1  
26.2 kb

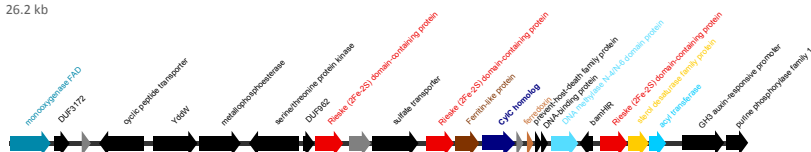

*Calothrix* sp. NIES-4071

AP018255.1  
Cluster 1  
23.3 kb

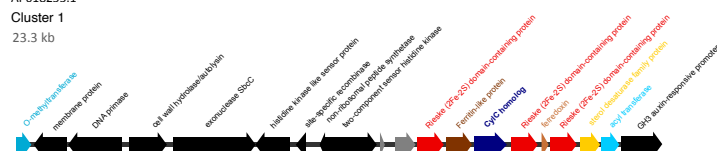

*Calothrix* sp. NIES-4105

AP018290.1  
Cluster 1  
23.3 kb

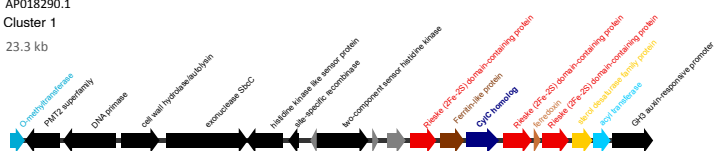

*Calothrix parasitica* NIES-267

AP018227.1  
12.2 kb

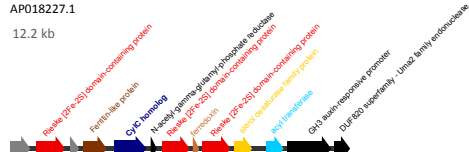



Supplementary Material – Eusebio et al. 2021

*Fremyella diplosiphon* NIES-3275  
AP018233.1  
28.9 kb

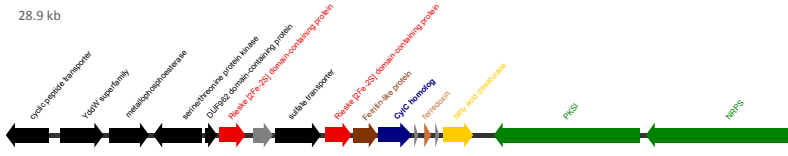

*cf. Phormidesmis* sp. LEGE 11477  
Cluster 1  
13.9 kb

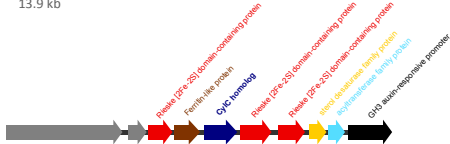

*Nostoc* sp. LEGE 12447  
Cluster1  
25.9 kb

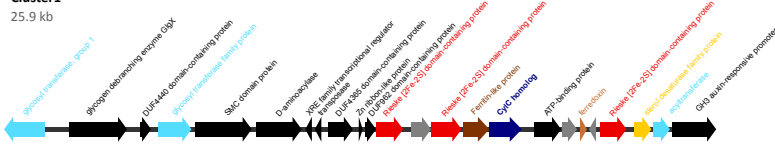

*Nostoc* sp. LEGE 12450  
Cluster1  
25.5 kb

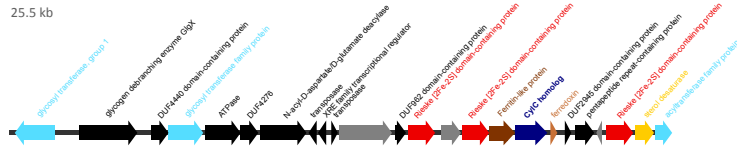

*Planktothrix rubescens* strain 7821  
Cluster 1  
13.8 kb

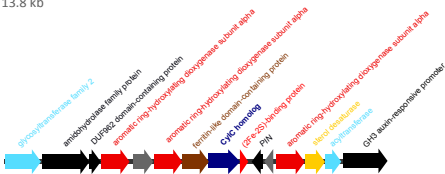

*Microcoleus* sp. PCC 7113  
CP003630.1  
21.2 kb

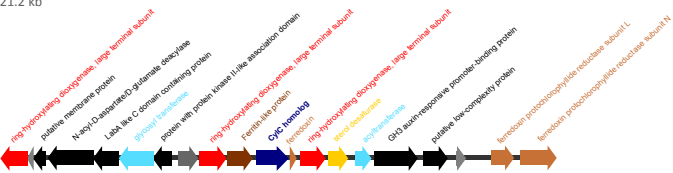

*Cylindrospermum stagnale* PCC 7417  
CP003642.1  
Cluster2  
7.9 kb

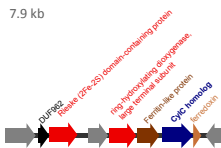



Supplementary Material – Eusebio et al. 2021

*Tolypothrix* sp. LEGE 11397

26.8 kb

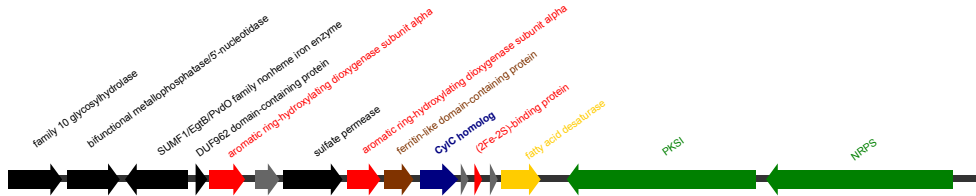

*Leptolyngbya* cf. *ectocarp* LEGE 11479

15.9 kb

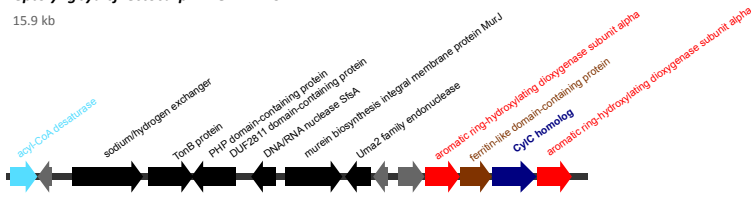

unidentified filamentous cyanobacterium LEGE 11480

16.5 kb

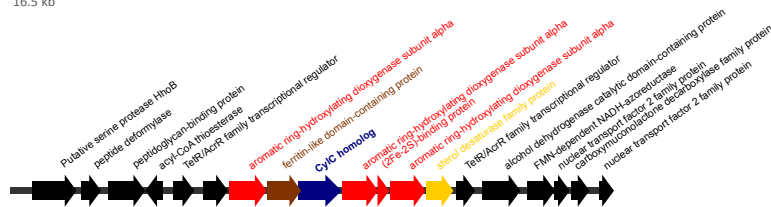

*Planktothrix agardhii* NIVA CYA 15

19.4 kb

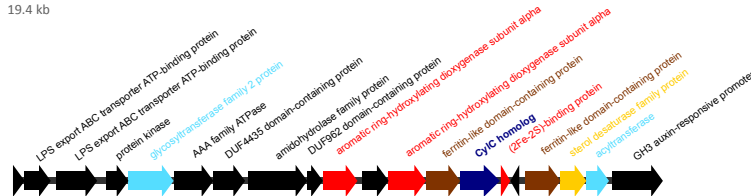

*Planktothrix rubescens* NIVA CYA 406

Cluster 1

30.3 kb

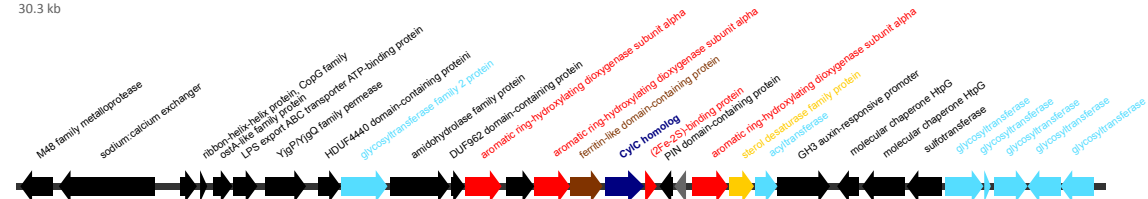

*Planktothrix rubescens* NIVA CYA 407

30.9 kb

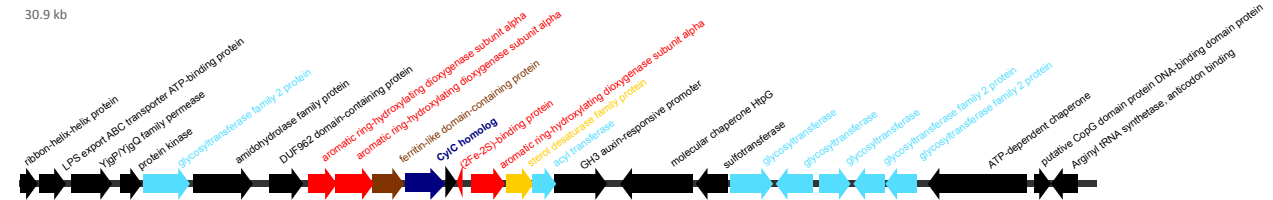

Supplementary Material – Eusebio et al. 2021

**Nostoc sp. PCC 7524**

29.2 kb

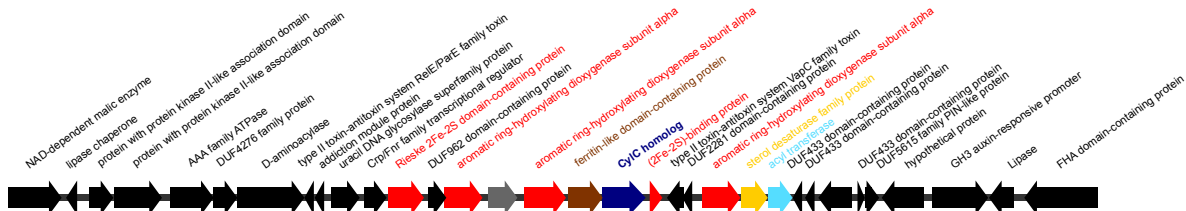

**Planktothrix paucivesiculata PCC 9631**

22.9 kb

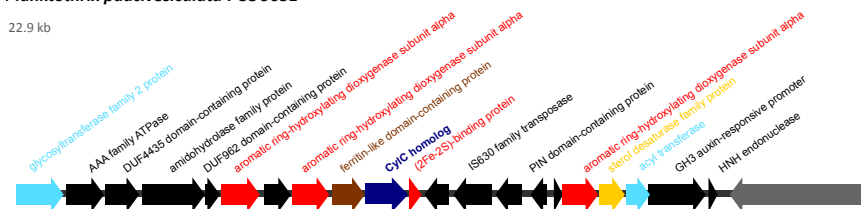

**Figure S4.** Rieske-containing biosynthetic gene clusters encoding CylC homolog(s).



Supplementary Material – Eusebio et al. 2021

*Synechocystis* sp. PCC 6803

CP003265.1

22.6 kb

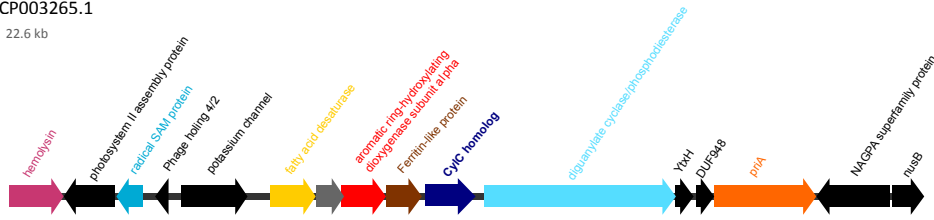

*Synechocystis* sp. PCC 6714

CP007542.1

18.7 kb

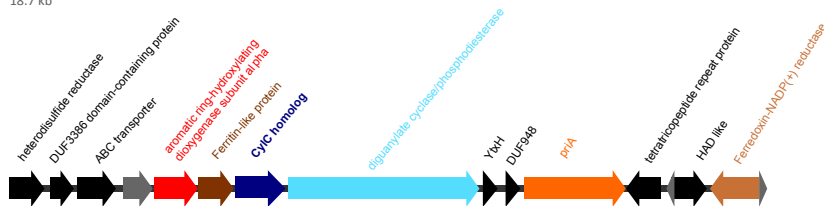

*Synechocystis* sp. IPPAS B-1465

CP028094.1

20.0 kb

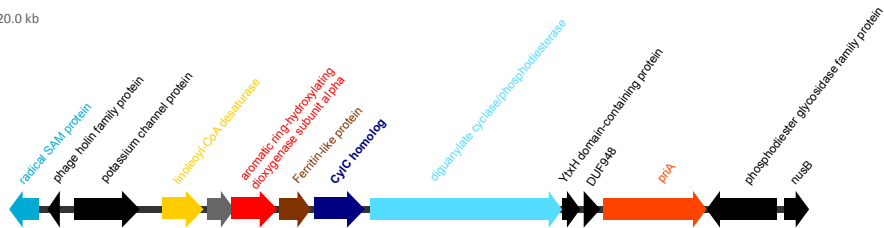

*Synechocystis salina* LEGE 00031

Cluster 1

18.4 kb

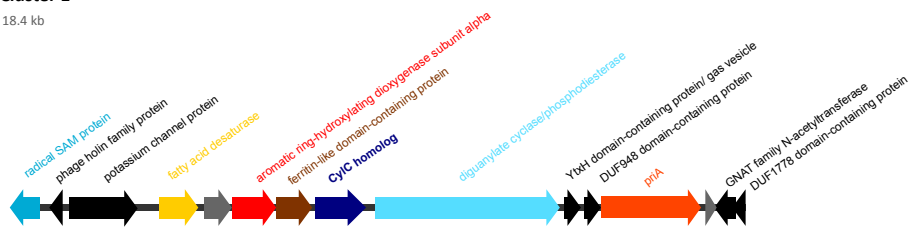

*Synechocystis salina* LEGE 00041

Cluster 1

18.4 kb

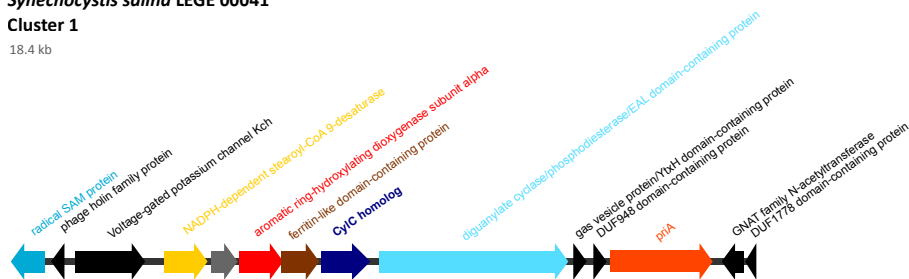

Figure S5. PriA-containing biosynthetic gene clusters encoding CylC homolog(s).

**Stanieria sp. NIES-3757**

AP017376.1

21. kb

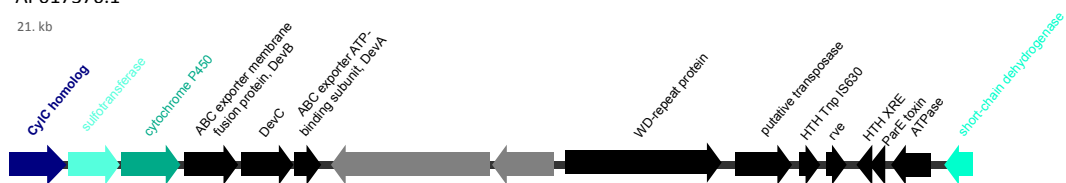

**Figure S6.** Cytochrome P450/sulfotransferase-containing biosynthetic gene cluster encoding a CylC homolog.

Supplementary Material – Eusebio et al. 2021

**Nostoc sp. CCAP 1453/38**

20.9 kb

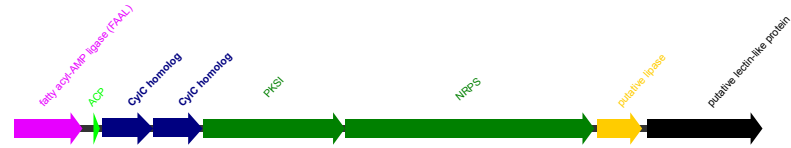

**Nodularia sp. HBU26**

KY594676.1

23.2 kb

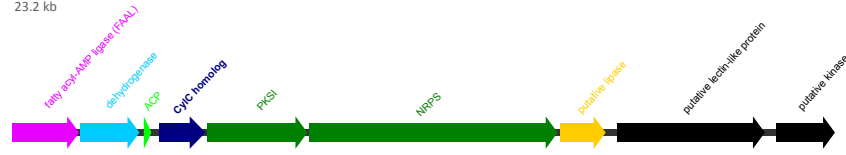

**Sphaerospermopsis sp. LEGE00249**

*chlorosphaerolactylates (cly)*

30.9 kb

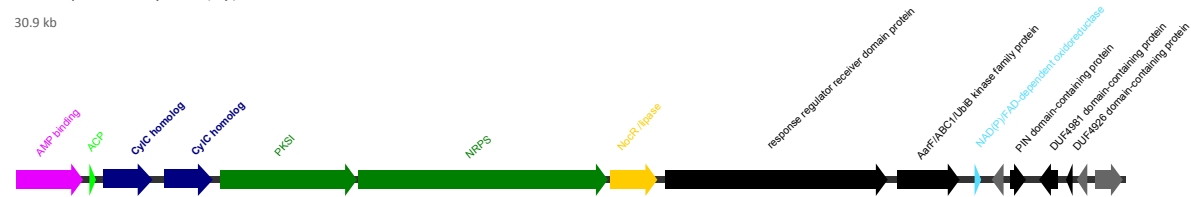

**Anabaena aphanizomenoides LEGE 00250**

19.4 kb

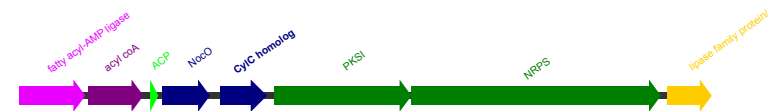

Supplementary Material – Eusebio et al. 2021

**Nodularia sp. LEGE 06071**

24.2 kb

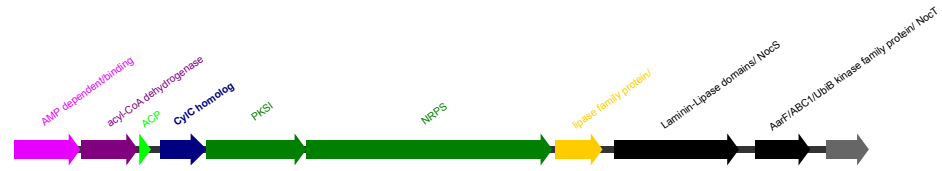

**Moorea bouillonii PNGS-198**

KP715425.1 columbamides (col)

**Cluster1**

26.7 kb

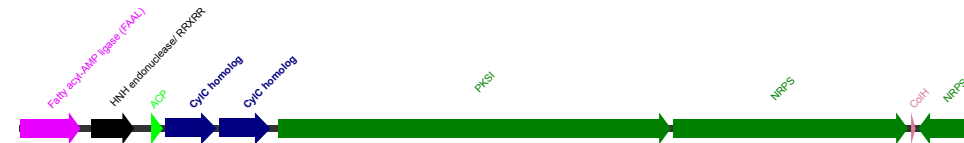

**Microcystis aeruginosa 91341**

**Cluster1**

28.7 kb

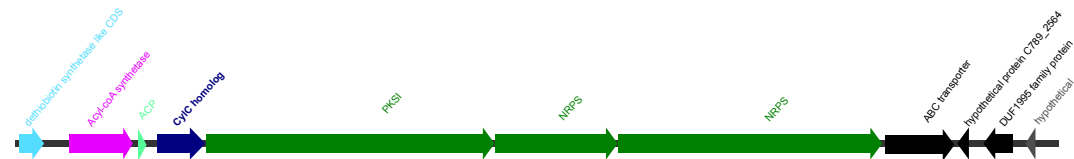

Supplementary Material – Eusebio et al. 2021

*Microcystis aeruginosa* PCC 9432

microginin (*mic*)

26.7 kb

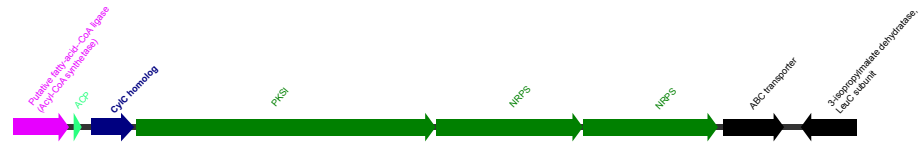

*Microcystis aeruginosa* FACHB-524

49.0 kb

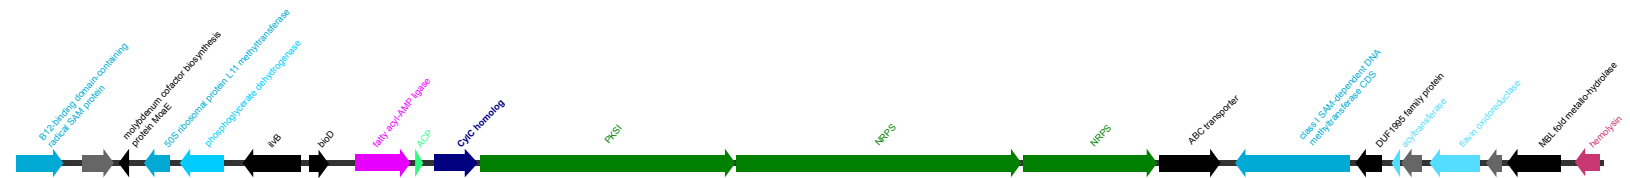

*Plankothrix rubescens* strain 7821

Cluster 2

27.0 kb

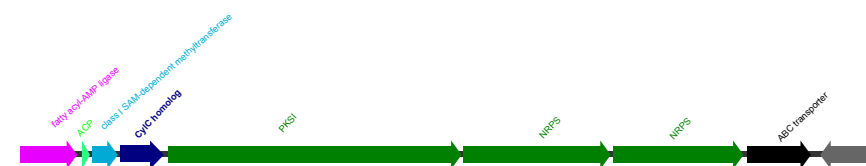

Supplementary Material – Eusebio et al. 2021

*Microcystis aeruginosa* NIES 87

28.0 kb

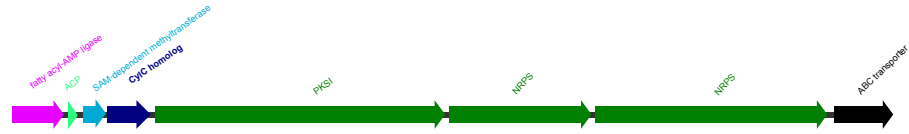

*Microcystis aeruginosa* NIES 98

31.7 kb

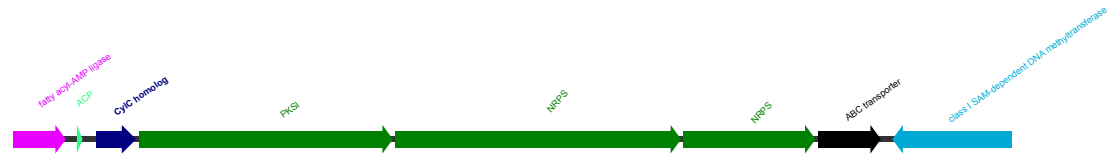

*Planktothrix rubescens* NIVA CYA 406

Cluster 2

25.1 kb

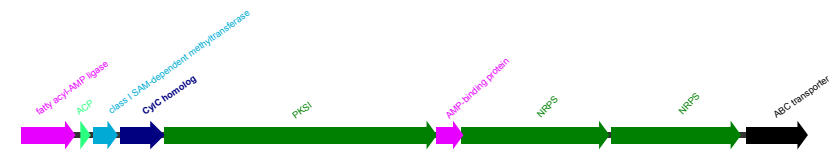

*Microcystis aeruginosa* PCC 7005

16.9 kb

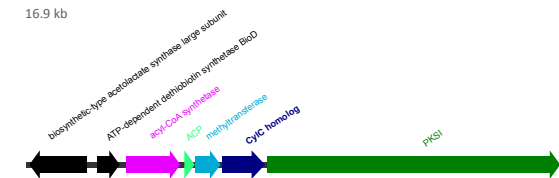

Supplementary Material – Eusebio et al. 2021

*Cylindrospermum stagnale* PCC 7417 plasmid

46.1 kb

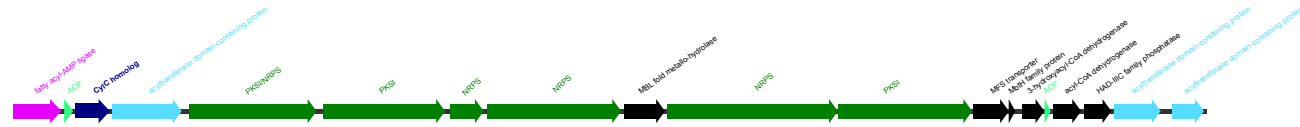

*Fischerella* sp. PCC 9431  
Cluster2

29.7 kb

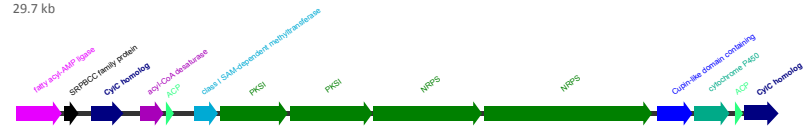

*Nostocales* cyanobacterium HT-58-2

CP019636

35.3 kb

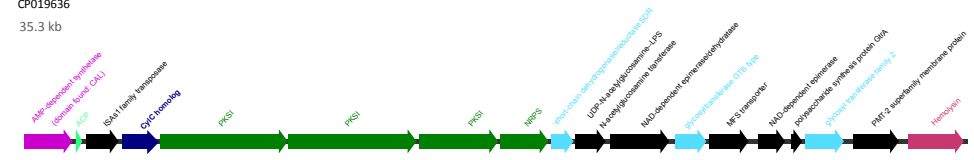

*Anabaena minutissima* UTEX B 1613

MH325199.1

*minutissamides* (puwainaphycin-like, puw)

62.2 kb

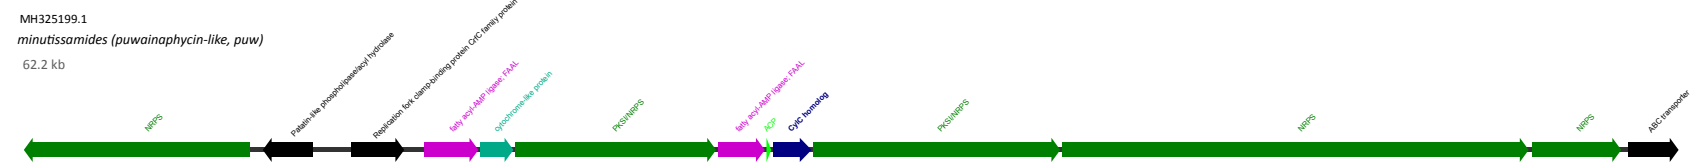

Supplementary Material – Eusebio et al. 2021

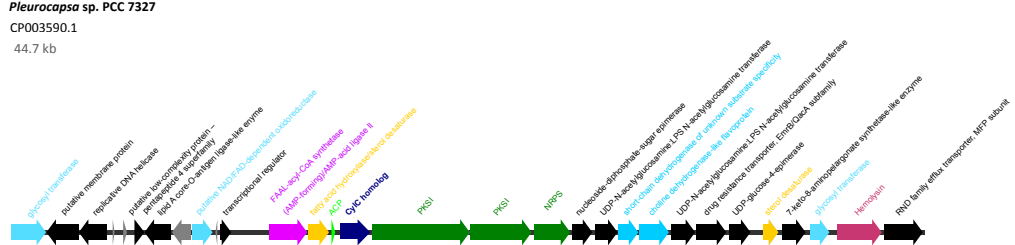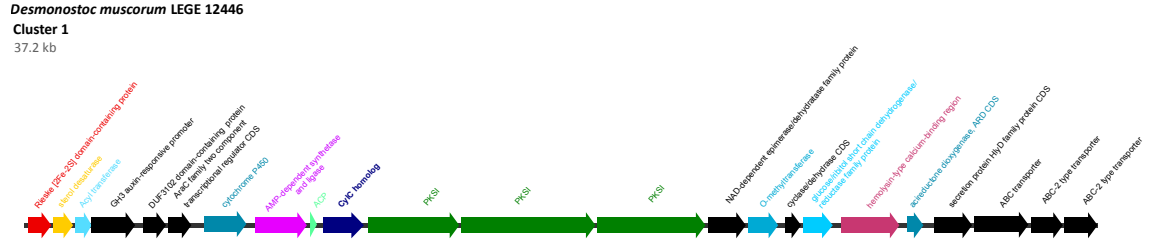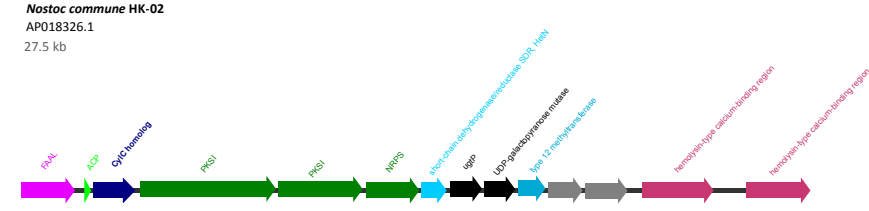



Supplementary Material – Eusebio et al. 2021

**Nostoc punctiforme PCC 73102**  
 CP001037.1  
 Cluster1  
 43.6 kb

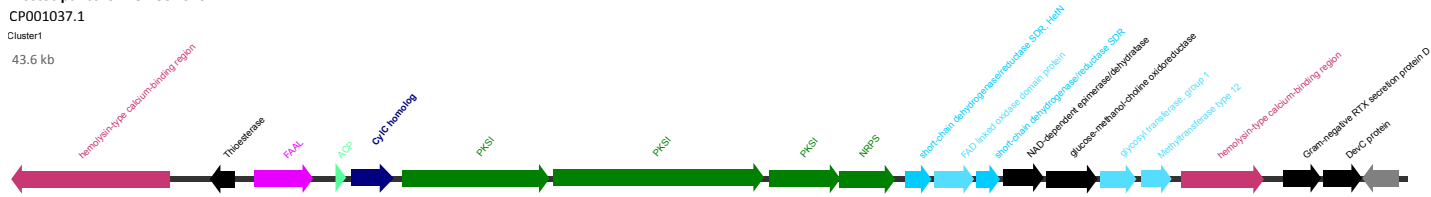

**Nostoc sp. LEGE 12447**  
 Cluster 3  
 26.9 kb

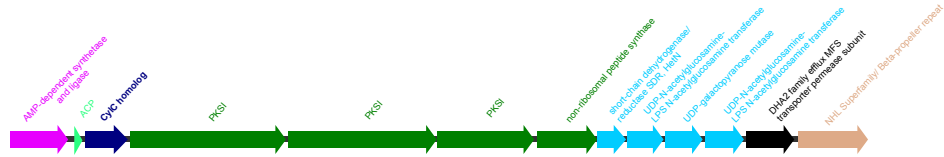

**Nostoc sp. NIES-4103**  
 AP018288.1  
 Cluster 2  
 37.3 kb

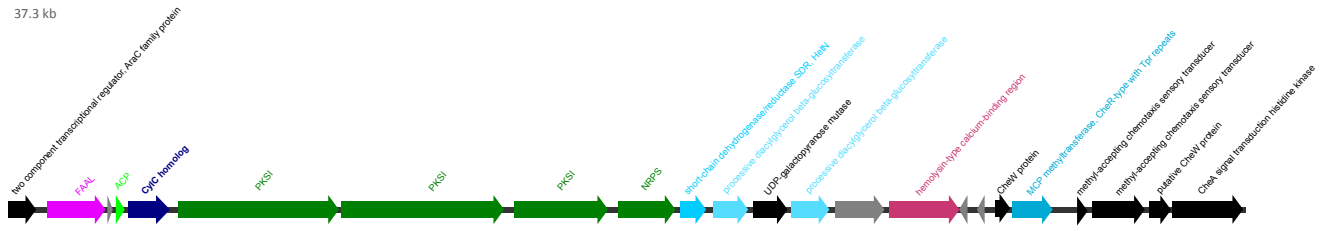

**Cyanoshece sp. PCC 7822**  
 CP002199.1  
 41.1 kb

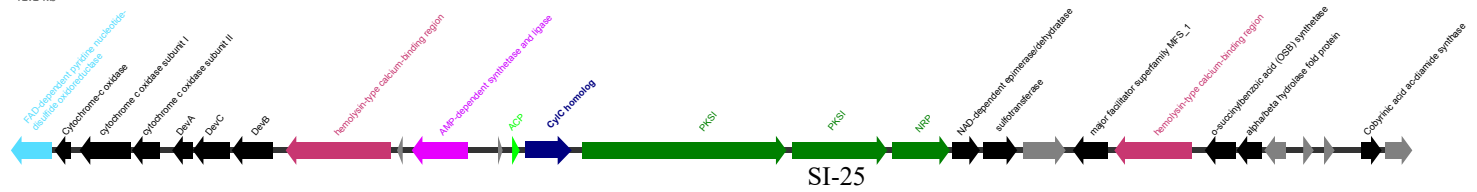

SI-25

Supplementary Material – Eusebio et al. 2021

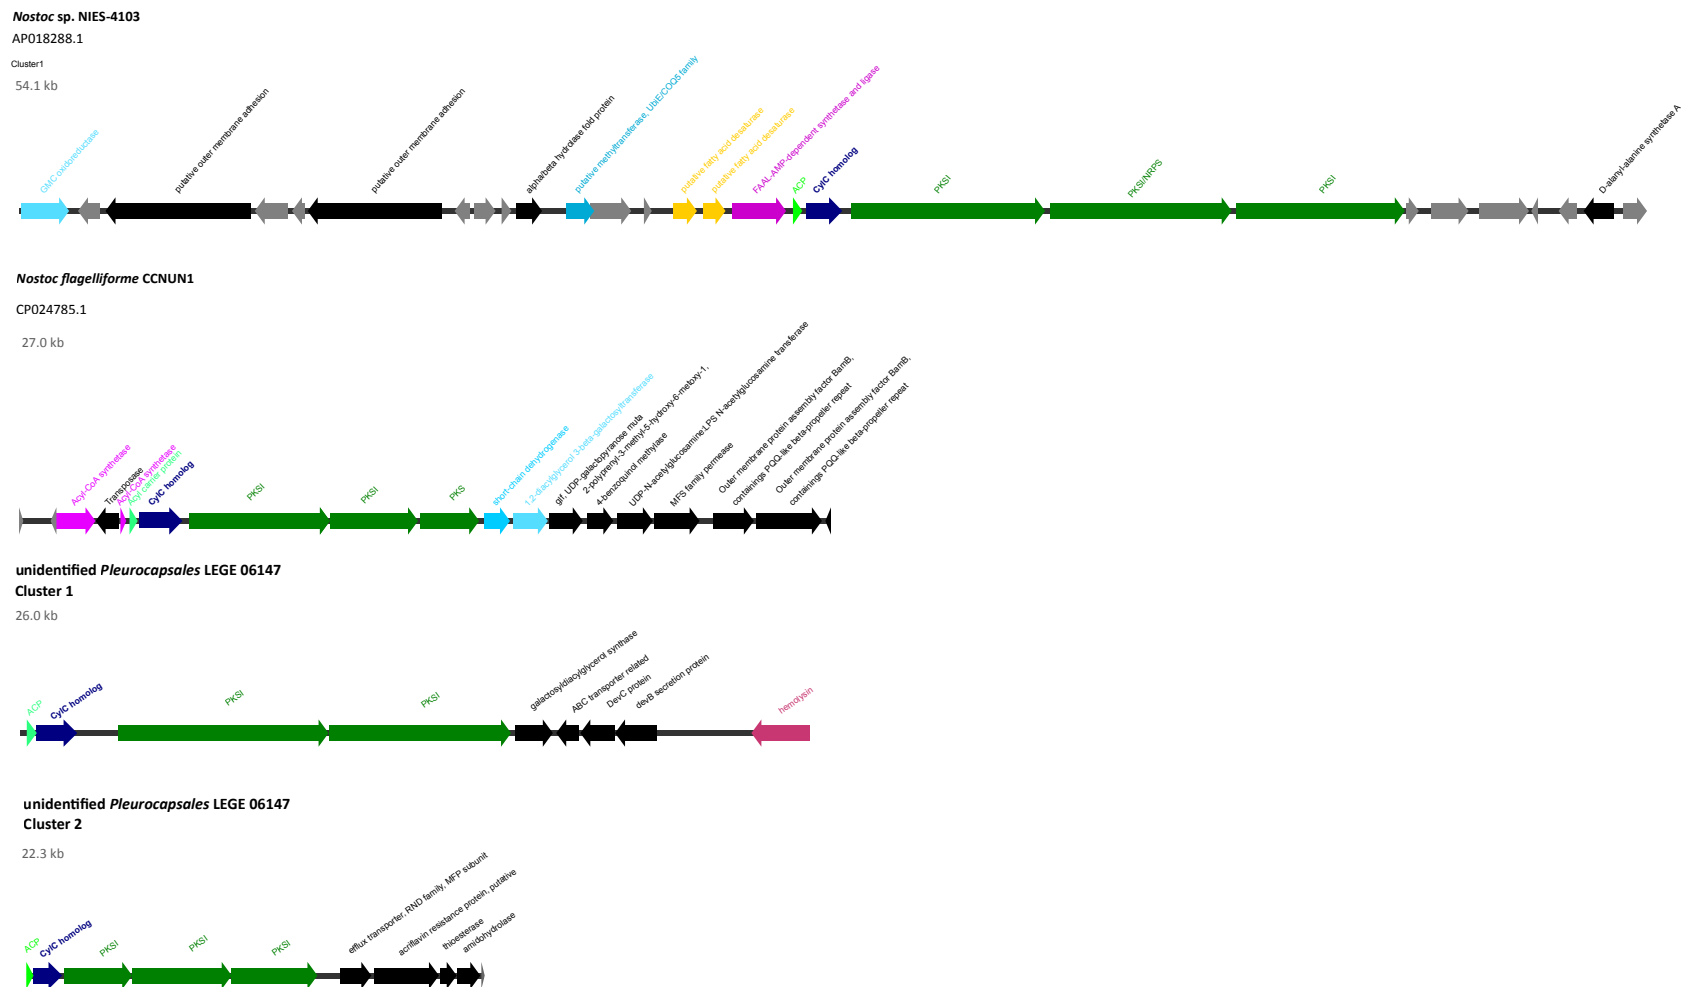

**Figure S7.** Type I PKS (chlorosphaerolactylate/columbamide/microginin/puwanaphycin-like) biosynthetic gene clusters encoding CylC homolog(s).

Supplementary Material – Eusebio et al. 2021

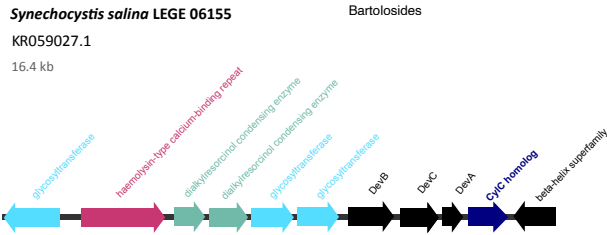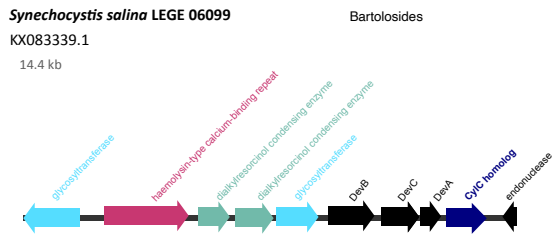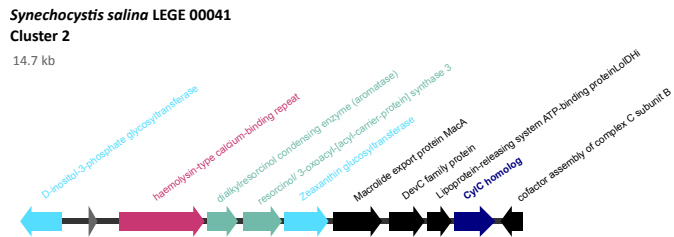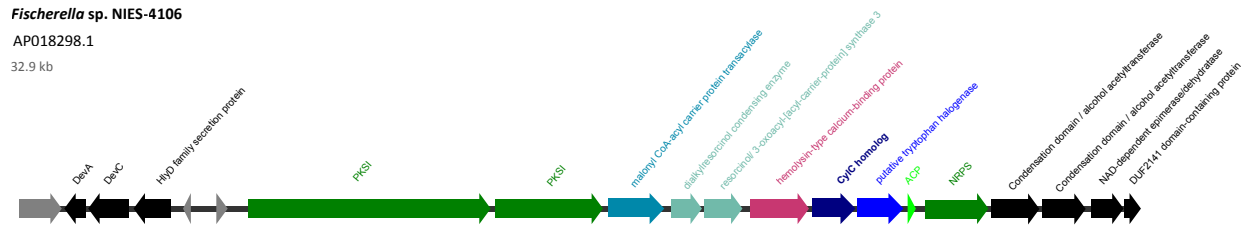

*Anabaena cylindrica* PCC 7122  
 CP003659.1 AP018166.1  
 16.4 kb

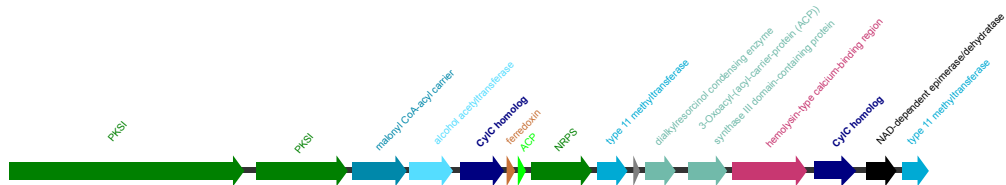

*Synechocystis salina* LEGE 00031  
 Cluster 2  
 27.9 kb

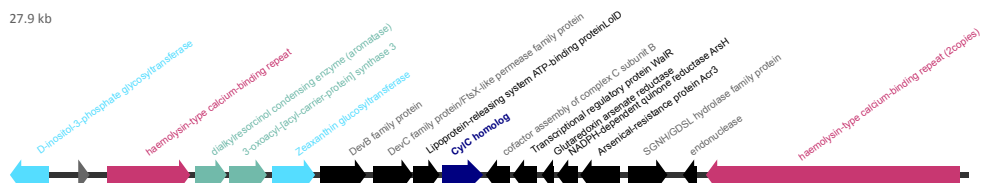

*Synechocystis* sp. LEGE 06083  
 Cluster 2  
 8.9 kb

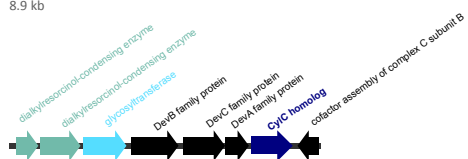

*Fischerella* sp. PCC9431  
 Cluster1  
 26.3 kb

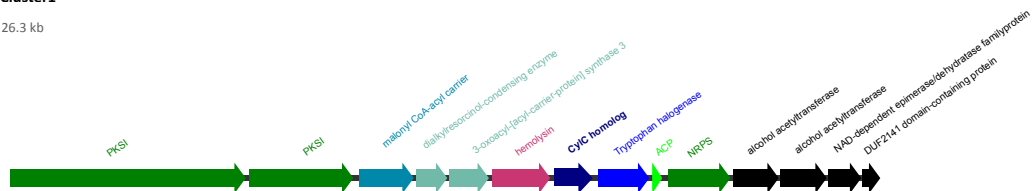

Figure S8. Dialkylresorcinol biosynthetic gene clusters encoding CylC homolog(s).

Supplementary Material – Eusebio et al. 2021

*Cylindrospermum licheniforme* UTEX B 2014 Cylindrocyclophane  
KX682397.1

30.2 kb

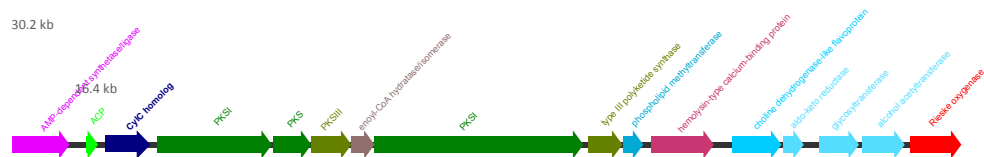

*Cylindrospermum stagnale* PCC 7417  
CP003642.1

Cluster1

36.4 kb

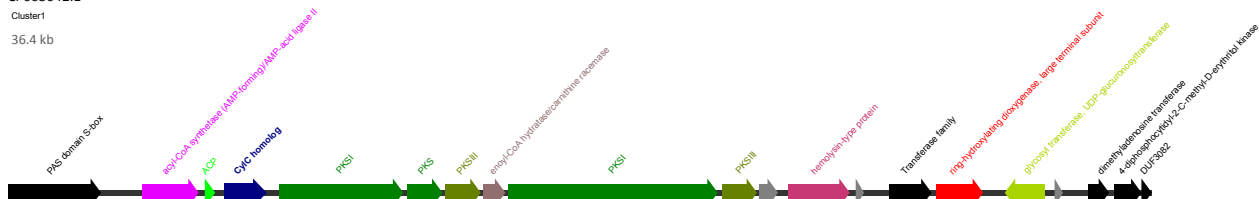

*Nostoc* sp. UIC 10110 Merocyclophane  
KY379971.1

23.0 kb

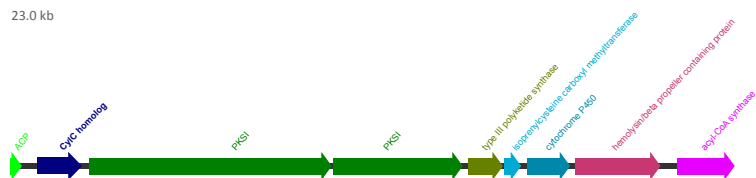

*Nostoc* sp. CAVN2 Carbamidocyclophane  
KT826756.1

28.0 kb

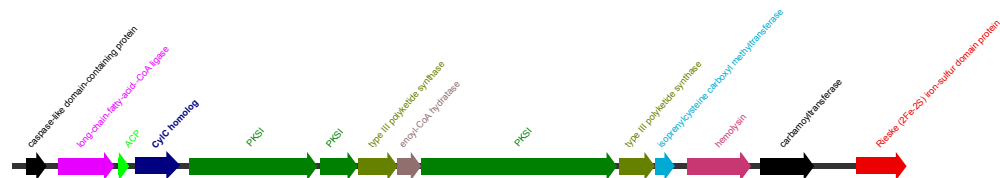

Supplementary Material – Eusebio et al. 2021

*Cylindrospermum* sp. NIES-4074

AP018269.1

24.0 kb

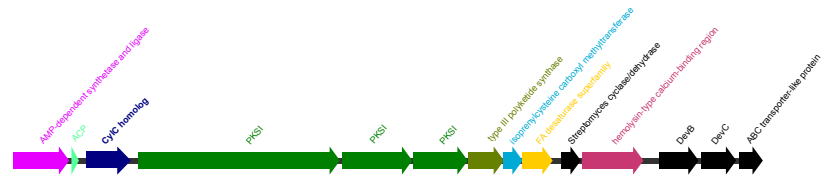

*Calothrix* sp. NIES-4071

AP018255.1

Cluster2

29.0 kb

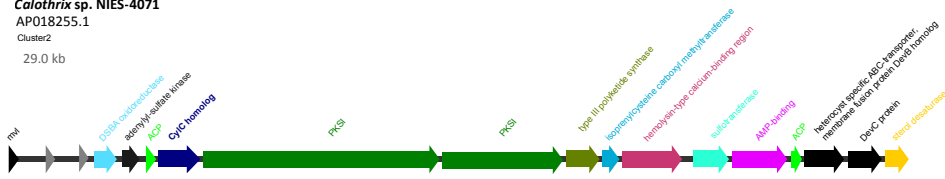

*Calothrix* sp. NIES-4105

AP018290.1

Cluster2

29.0 kb

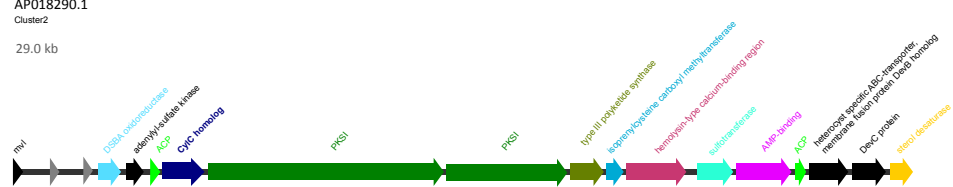

unidentified *Pleurocapsales* LEGE 10410

Cluster 1

30.0 kb

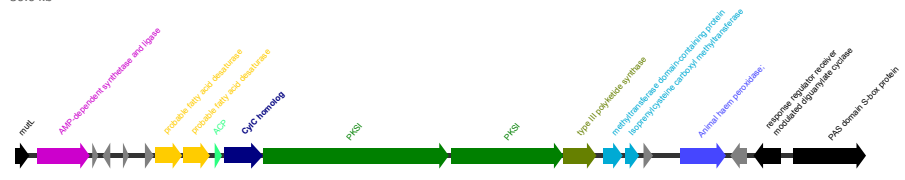

*Hyella patelloides* LEGE 07179

23.0 kb

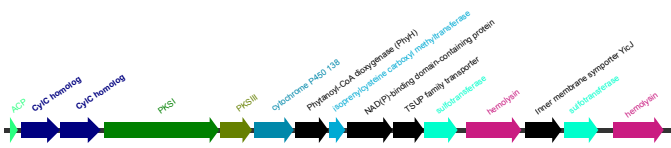

Supplementary Material – Eusebio et al. 2021

unidentified *Pleurocapsales* LEGE 06147

Cluster 3

20.0 kb

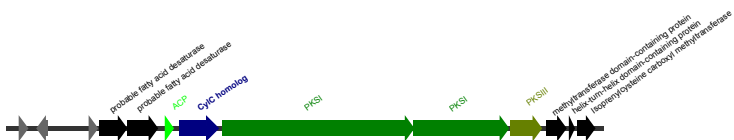

*Moorea producens* PAL-8-15-08-1

40.1 kb

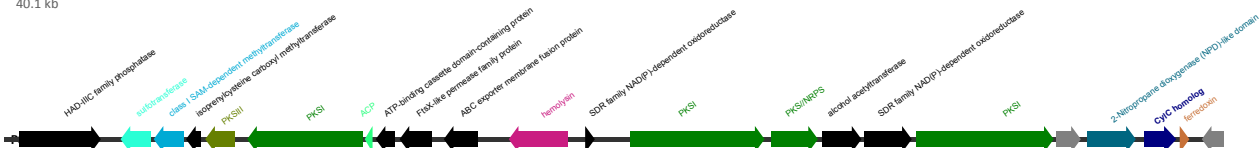

*Moorea producens* JHB

CP017708.1

37.2 kb

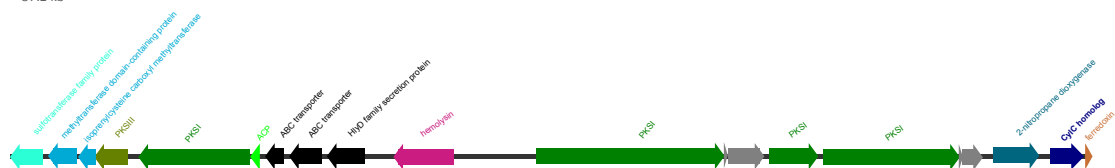

*Lyngbya bouillonii* PNG5 198

Cluster2

37.0 kb

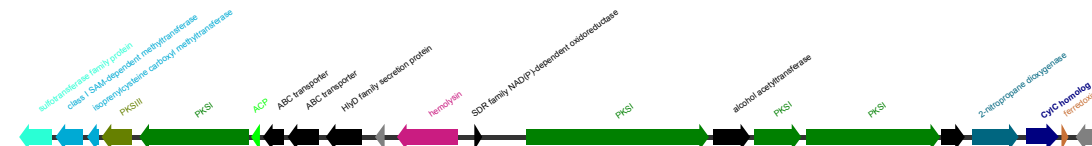

**Figure S9.** Type III PKS biosynthetic gene clusters encoding CylC homolog(s).

Supplementary Material – Eusebio et al. 2021

*Desmonostoc muscorum* LEGE 12446

Cluster 2

13.6 kb

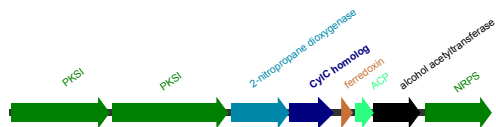

*Nostoc* sp. LEGE 12450

Cluster2

21.2 kb

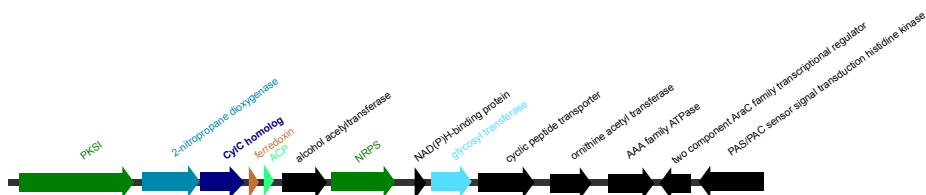

*Nostoc* sp. LEGE 12447

Cluster 2

30.5 kb

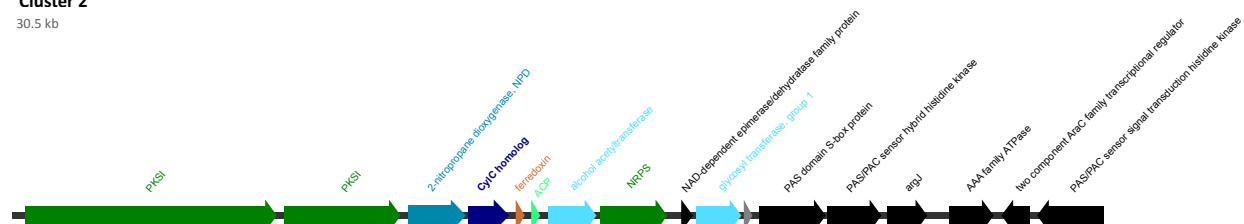

Figure S10. Nitronate monooxygenase-containing biosynthetic gene clusters encoding a CylC homolog.



***Microcystis aeruginosa* LEGE 11464**

11.0 kb

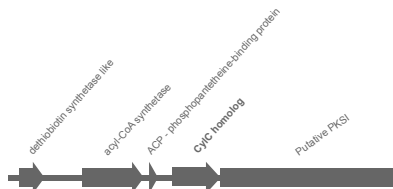

**PCC9701**

14.3 kb

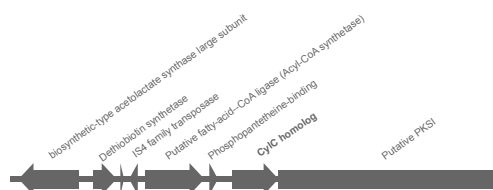

**unidentified *Pleurocapsales* LEGE 10410**

**Cluster 2**

17.6 kb

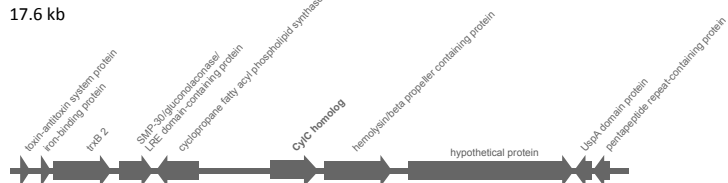

**Figure S11.** Unclassified (likely incomplete) biosynthetic gene clusters encoding a CylC homolog.

**Table S4.** BLAST search of Rieske-containing BGCs genes from *Calothrix brevissima* NIES 22 against *Synechocystis* sp. PCC 6803.

| Gene                | Annotation                                     | PCC 6803 ortholog | E-value   | Identity | Query Coverage | Bit-Score |
|---------------------|------------------------------------------------|-------------------|-----------|----------|----------------|-----------|
| <b>NIES22_66770</b> | DUF962 domain-containing protein               | none              |           |          |                |           |
| <b>NIES22_66780</b> | Rieske aromatic ring-hydroxylating dioxygenase | sll1849           | 8.68E-97  | 68.6     | 61.63          | 311.227   |
| <b>NIES22_66790</b> | hypothetical                                   | sll0263           | 2.85E-67  | 46.4     | 84.92          | 222.246   |
| <b>NIES22_66800</b> | Rieske aromatic ring-hydroxylating dioxygenase | sll0264           | 5.74E-137 | 60.2     | 97.01          | 426.402   |
| <b>NIES22_66810</b> | ferritin-like diiron protein                   | sll0265           | 8.33E-74  | 43.3     | 98.67          | 243.817   |
| <b>NIES22_66820</b> | hypothetical                                   | slr0326           | 1.31E-17  | 67.1     | 78.65          | 72.789    |
| <b>NIES22_66830</b> | CylC-like dimetal-carboxylate halogenase       | sll0266           | 5.63E-158 | 60.8     | 94.37          | 489.574   |
| <b>NIES22_66840</b> | hypothetical                                   | none              |           |          |                |           |
| <b>NIES22_66850</b> | ferredoxin                                     | ssl2559           | 1.79E-28  | 53.4     | 93.62          | 107.071   |
| <b>NIES22_66860</b> | Rieske aromatic ring-hydroxylating dioxygenase | sll1297           | 3.15E-147 | 61.5     | 100            | 456.447   |
| <b>NIES22_66880</b> | sterol desaturase or sphingolipid hydroxylase  | sll1510           | 1.88E-59  | 45.9     | 99.59          | 199.904   |
| <b>NIES22_66890</b> | acyl transferase                               | sll1511           | 3.08E-56  | 51       | 76.12          | 188.734   |

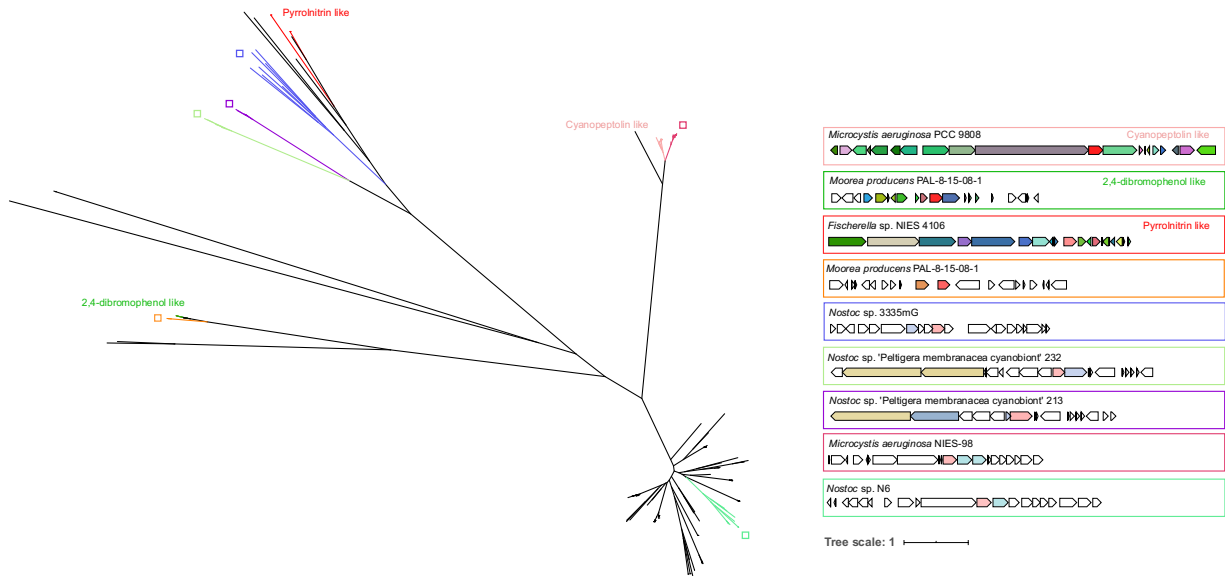

**Figure S12.** Phylogenetic tree of FAD-dependent halogenases based on CORASON outputs with illustrative BGC architectures.

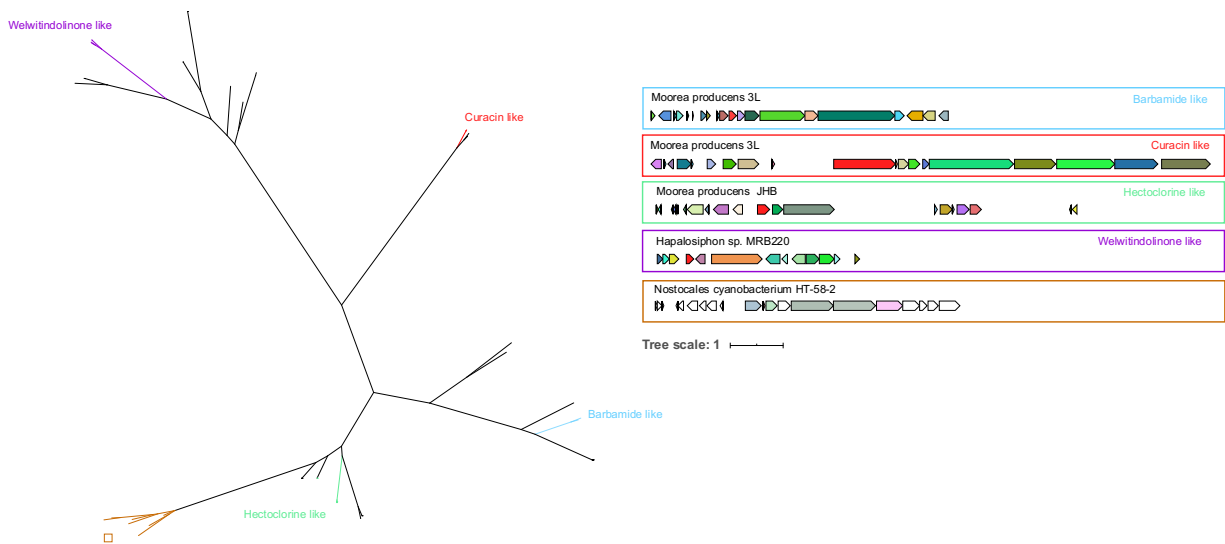

**Figure S13.** Phylogenetic tree of nonheme iron-dependent halogenases based on CORASON outputs with illustrative BGC architectures.

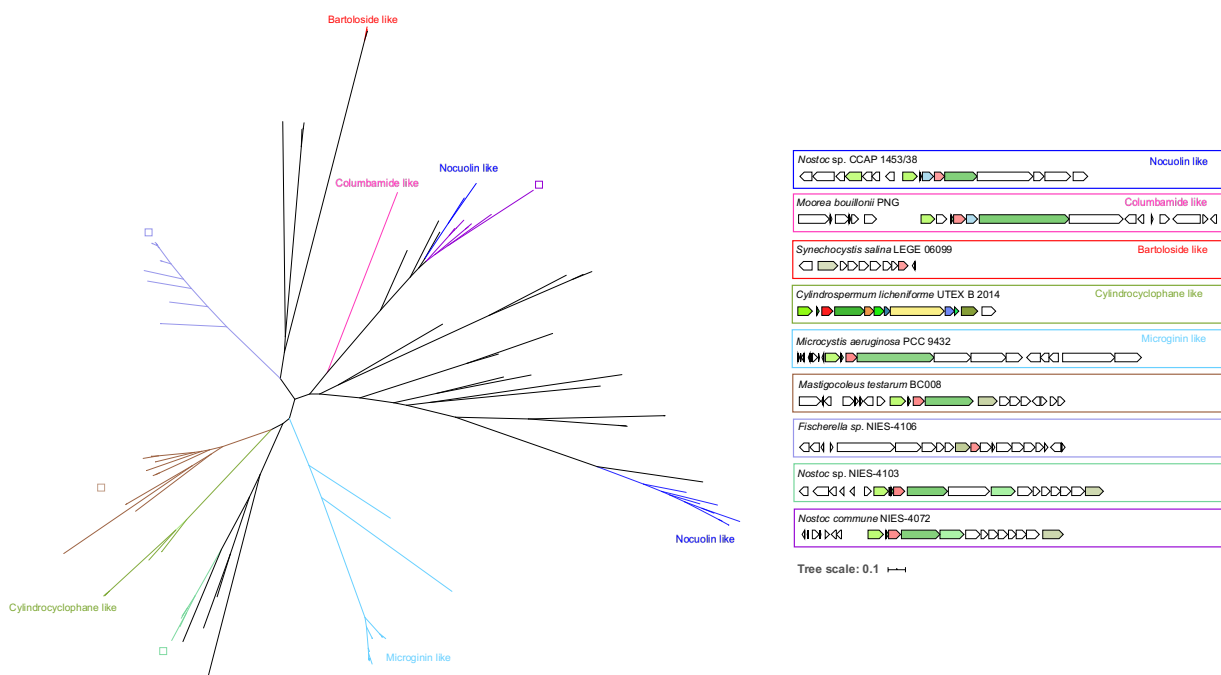

**Figure S14.** Phylogenetic tree of dimetal-carboxylate halogenases based on CORASON outputs with illustrative BGC architectures.
